# Supplementary material for: Gel self-assembly of lanthanum aminopolycarboxylates with skeleton structures and adsorptions of gases
Source: Royal Society of Chemistry journal article supplement (doi:10.1039/d1nj02237g), 2021-01-01
Supplement: d1nj02237g1.pdf [file d1nj02237g1.pdf]

## Supporting materials

### Gel self-assembly of lanthanum aminopolycarboxylates with skeleton structures and adsorptions of gases

Si-Yuan Wang,<sup>1</sup> Zhen-Lang Xie,<sup>2</sup> Xin Dong,<sup>2</sup> Zhao-Hui Zhou<sup>2,\*</sup>

*a.* <sup>1</sup>School of Pharmacy, Heilongjiang University of Chinese Medicine, Haerbin, 150040, China;

<sup>2</sup>State Key Laboratory for Physical Chemistry of Solid Surfaces and College of Chemistry and Chemical Engineering, Xiamen University, Xiamen, 361005, China.

#### Figure and Table Options

**Figure S1.** 2D layered structure of  $[\text{La}(\text{Hida})_2(\text{H}_2\text{O})_2]_n \cdot n\text{Cl} \cdot 4n\text{H}_2\text{O}$  (**1**) viewed along *a* and *b* axis.

**Figure S2.** Schematic descriptions of the equivalent topology frameworks in  $[\text{La}(\text{Hida})_2(\text{H}_2\text{O})_2]_n \cdot n\text{Cl} \cdot 4n\text{H}_2\text{O}$  (**1**) viewed along *c* axis.

**Figure S3.** 2D layered structure of  $\text{K}_{2n}[\text{La}(\text{nta})_2]_n \cdot n\text{H}_2\text{O}$  (**2**) viewed along *a* and *b* axis.

**Figure S4.** Schematic descriptions of the equivalent topology frameworks in  $\text{K}_{2n}[\text{La}(\text{nta})_2]_n \cdot n\text{H}_2\text{O}$  (**2**).

**Figure S5.** Diagram of the  $[\text{La}_2(\text{edta})_2(\text{H}_2\text{O})_2]^{2-}$  dimeric unit in  $(\text{H}_2\text{en})_n[\text{La}(\text{edta})(\text{H}_2\text{O})]_{2n} \cdot 10n\text{H}_2\text{O}$  (**3**).

**Figure S6.** 2D layered structure of  $(\text{H}_2\text{en})_n[\text{La}(\text{edta})(\text{H}_2\text{O})]_{2n} \cdot 10n\text{H}_2\text{O}$  (**3**).

**Figure S7.** Schematic descriptions of the equivalent topology frameworks in  $(\text{H}_2\text{en})_n[\text{La}(\text{edta})(\text{H}_2\text{O})]_{2n} \cdot 10n\text{H}_2\text{O}$  (**3**) viewed along *c* axis.

**Figure S8.** TG–DTG curves of  $[\text{La}(\text{Hida})_2(\text{H}_2\text{O})_2]_n \cdot n\text{Cl} \cdot 4n\text{H}_2\text{O}$  (**1**).

**Figure S9.** TG–DTG curves of  $\text{K}_{2n}[\text{La}(\text{nta})_2]_n \cdot n\text{H}_2\text{O}$  (**2**).

**Figure S10.** TG–DTG curves of  $(\text{H}_2\text{en})_n[\text{La}(\text{edta})(\text{H}_2\text{O})]_{2n} \cdot 10n\text{H}_2\text{O}$  (**3**).

**Figure S11.** IR spectra of  $[\text{La}(\text{Hida})_2(\text{H}_2\text{O})_2]_n \cdot n\text{Cl} \cdot 4n\text{H}_2\text{O}$  (**1**),  $\text{K}_{2n}[\text{La}(\text{nta})_2]_n \cdot n\text{H}_2\text{O}$  (**2**) and  $(\text{H}_2\text{en})_n[\text{La}(\text{edta})(\text{H}_2\text{O})]_{2n} \cdot 10n\text{H}_2\text{O}$  (**3**).

**Figure S12.**  $\text{O}_2$ ,  $\text{CO}_2$ ,  $\text{CH}_4$ ,  $\text{N}_2$  and  $\text{H}_2$  adsorption isotherms of  $(\text{H}_2\text{en})_n[\text{La}(\text{edta})(\text{H}_2\text{O})]_{2n} \cdot 10n\text{H}_2\text{O}$  (**3**, a) and  $\{\text{La}(\text{H}_2\text{O})_4[\text{La}(1,3\text{-pdta})(\text{H}_2\text{O})]_3\}_n \cdot 11.25n\text{H}_2\text{O}$  (**4**, b) at 298 K.

**Table S1.** Bond valence calculations for  $[\text{La}(\text{Hida})_2(\text{H}_2\text{O})_2]_n \cdot n\text{Cl} \cdot 4n\text{H}_2\text{O}$  (**1**),  $\text{K}_{2n}[\text{La}(\text{nta})_2]_n \cdot n\text{H}_2\text{O}$  (**2**) and  $(\text{H}_2\text{en})_n[\text{La}(\text{edta})(\text{H}_2\text{O})]_{2n} \cdot 10n\text{H}_2\text{O}$  (**3**).

**Table S2.** Adsorption data of  $\text{O}_2$ ,  $\text{CO}_2$ ,  $\text{CH}_4$ ,  $\text{N}_2$ ,  $\text{H}_2$  and desorption data of  $\text{O}_2$  (mg/g) of  $(\text{H}_2\text{en})_n[\text{La}(\text{edta})(\text{H}_2\text{O})]_{2n} \cdot 10n\text{H}_2\text{O}$  (**3**) at 298 K under different pressure respectively.

**Table S3.** Adsorption data of  $\text{O}_2$ ,  $\text{CO}_2$ ,  $\text{CH}_4$ ,  $\text{N}_2$ ,  $\text{H}_2$  and desorption data of  $\text{O}_2$ ,  $\text{CO}_2$  (mg/g) of  $\{\text{La}(\text{H}_2\text{O})_4[\text{La}(1,3\text{-pdta})(\text{H}_2\text{O})]_3\}_n \cdot 11.25n\text{H}_2\text{O}$  (**4**) at 298 K under different pressure respectively.

**Table S4.** Solid state  $^{13}\text{C}$  NMR data for  $[\text{La}(\text{Hida})_2(\text{H}_2\text{O})_2]_n \cdot n\text{Cl} \cdot 4n\text{H}_2\text{O}$  (**1**),  $\text{K}_{2n}[\text{La}(\text{nta})_2]_n \cdot n\text{H}_2\text{O}$  (**2**) and  $(\text{H}_2\text{en})_n[\text{La}(\text{edta})(\text{H}_2\text{O})]_{2n} \cdot 10n\text{H}_2\text{O}$  (**3**).

**Table S5.** Crystallographic data and structural refinements for  $[\text{La}(\text{Hida})_2(\text{H}_2\text{O})_2]_n \cdot n\text{Cl} \cdot 4n\text{H}_2\text{O}$  (**1**),  $\text{K}_{2n}[\text{La}(\text{nta})_2]_n \cdot n\text{H}_2\text{O}$  (**2**) and  $(\text{H}_2\text{en})_n[\text{La}(\text{edta})(\text{H}_2\text{O})]_{2n} \cdot 10n\text{H}_2\text{O}$  (**3**).

**Table S6.** Selected bond distances ( $\text{\AA}$ ) and angles ( $^\circ$ ) for  $[\text{La}(\text{Hida})_2(\text{H}_2\text{O})_2]_n \cdot n\text{Cl} \cdot 4n\text{H}_2\text{O}$  (**1**).

**Table S7.** Selected bond distances ( $\text{\AA}$ ) and angles ( $^\circ$ ) for  $\text{K}_{2n}[\text{La}(\text{nta})_2]_n \cdot n\text{H}_2\text{O}$  (**2**).

**Table S8.** Selected bond distances ( $\text{\AA}$ ) and angles ( $^\circ$ ) for  $(\text{H}_2\text{en})_n[\text{La}(\text{edta})(\text{H}_2\text{O})]_{2n} \cdot 10n\text{H}_2\text{O}$  (**3**).

**Table S9.** Selected bond distances ( $\text{\AA}$ ) and angles ( $^\circ$ ) within the water layer in  $[\text{La}(\text{Hida})_2(\text{H}_2\text{O})_2]_n \cdot n\text{Cl} \cdot 4n\text{H}_2\text{O}$  (**1**).

**Table S10.** Selected bond distances ( $\text{\AA}$ ) and angles ( $^\circ$ ) within the water layer in  $(\text{H}_2\text{en})_n[\text{La}(\text{edta})(\text{H}_2\text{O})]_{2n} \cdot 10n\text{H}_2\text{O}$  (**3**).

**Table S11.** Comparisons of selected bond distances ( $\text{\AA}$ ) for **1** – **33**.

**Figure S1.** 2D layered structure of  $[\text{La}(\text{Hida})_2(\text{H}_2\text{O})_2]_n \text{ nCl } 4\text{nH}_2\text{O}$  (**1**) viewed along  $a$  and  $b$  axis.

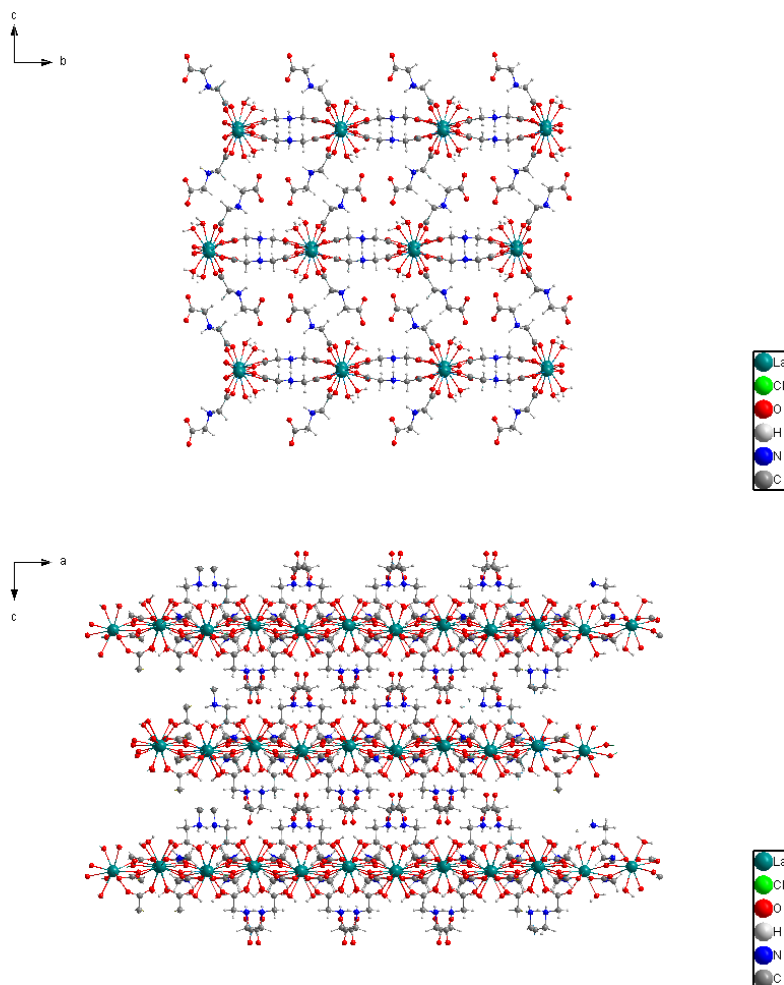

**Figure S2.** Schematic descriptions of the equivalent topology frameworks in  $[\text{La}(\text{Hida})_2(\text{H}_2\text{O})_2]_n \text{ nCl } 4\text{nH}_2\text{O}$  (**1**) viewed along  $c$  axis.

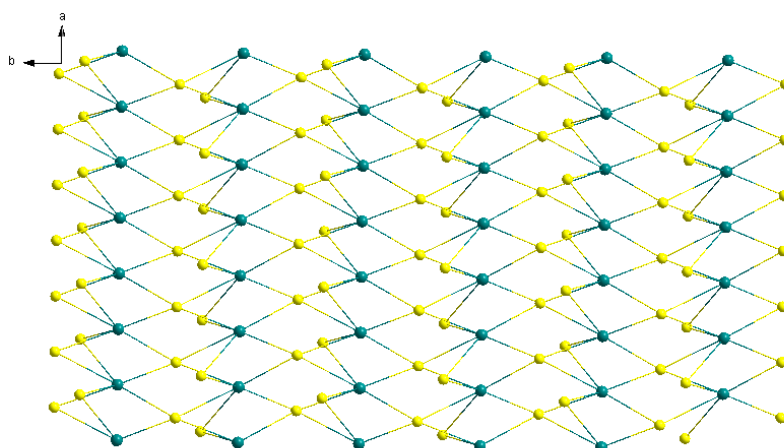

**Figure S3.** 2D layered structure of  $K_{2n}[La(NTA)_2]_n \cdot nH_2O$  (**2**) viewed along  $a$  and  $b$  axis.

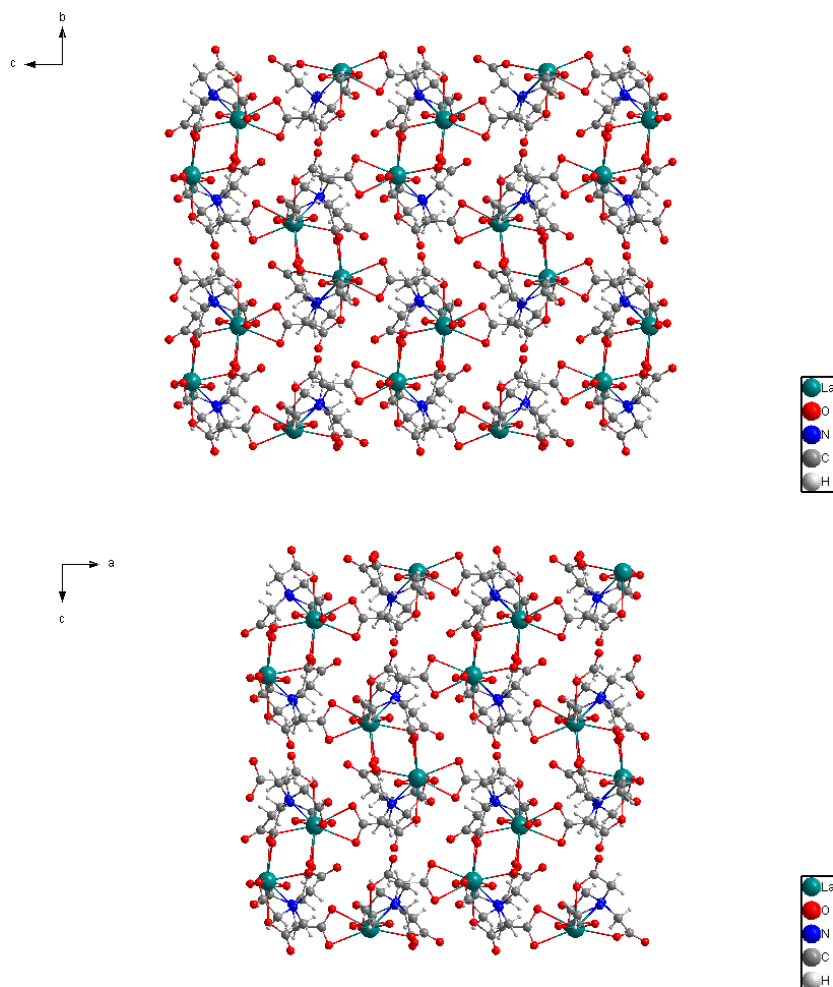

**Figure S4.** Schematic descriptions of the equivalent topology frameworks in  $\text{K}_{2n}[\text{La}(\text{nta})_2]_n \cdot n\text{H}_2\text{O}$  (**2**).

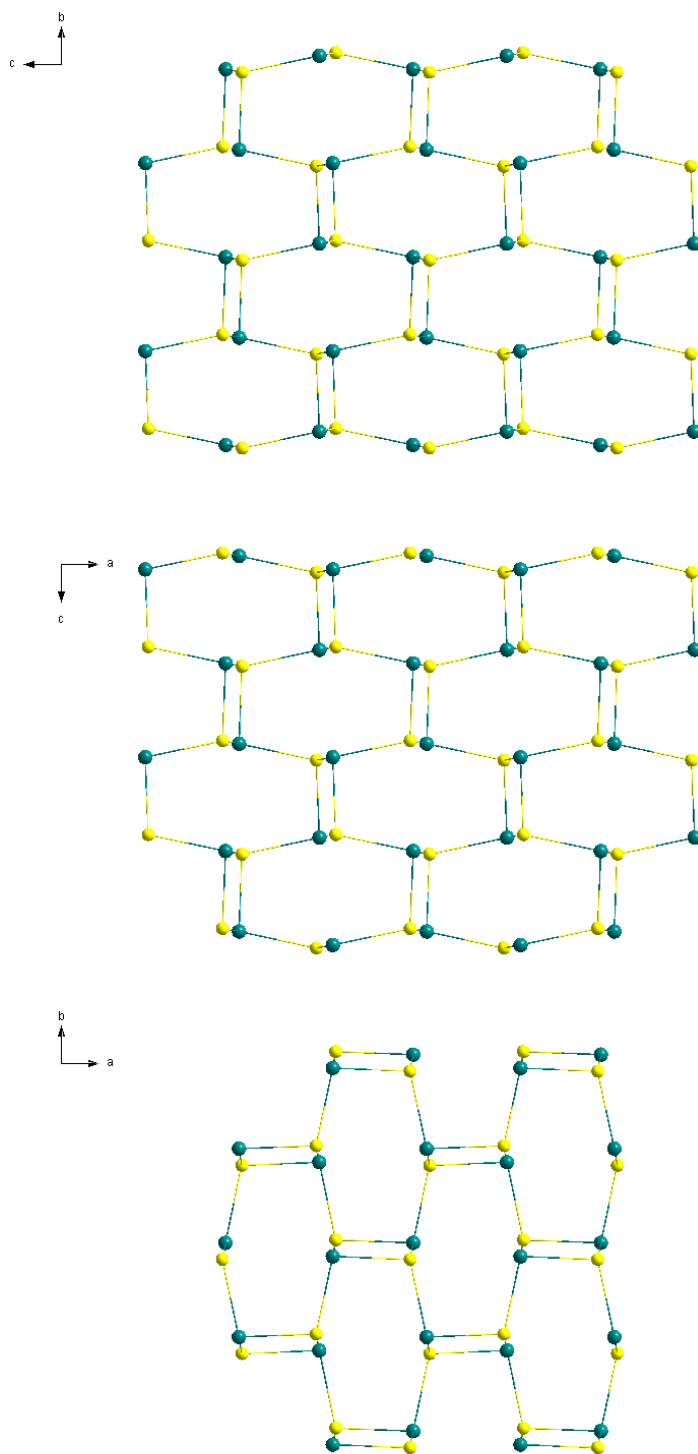

**Figure S5.** Diagram of the  $[\text{La}_2(\text{edta})_2(\text{H}_2\text{O})_2]^{2-}$  dimeric unit in  $(\text{H}_2\text{en})_n[\text{La}(\text{edta})(\text{H}_2\text{O})]_{2n} \cdot 10n\text{H}_2\text{O}$  (**3**).

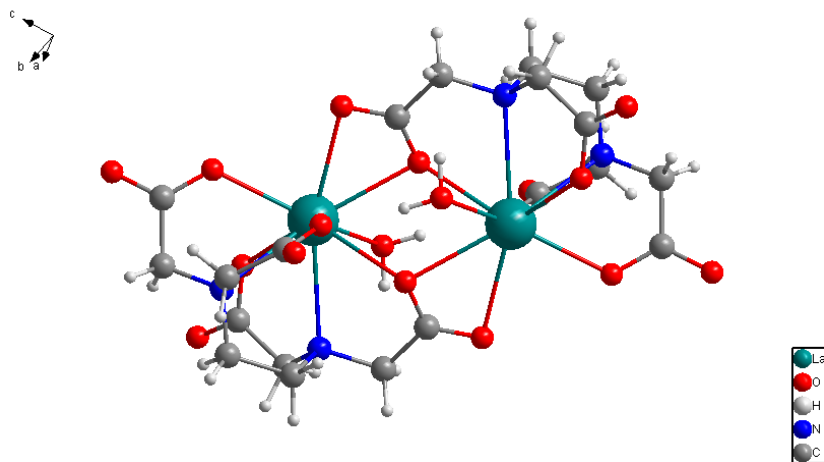

**Figure S6.** 2D layered structure of  $(\text{H}_2\text{en})_n[\text{La}(\text{edta})(\text{H}_2\text{O})]_{2n} \cdot 10n\text{H}_2\text{O}$  (**3**).

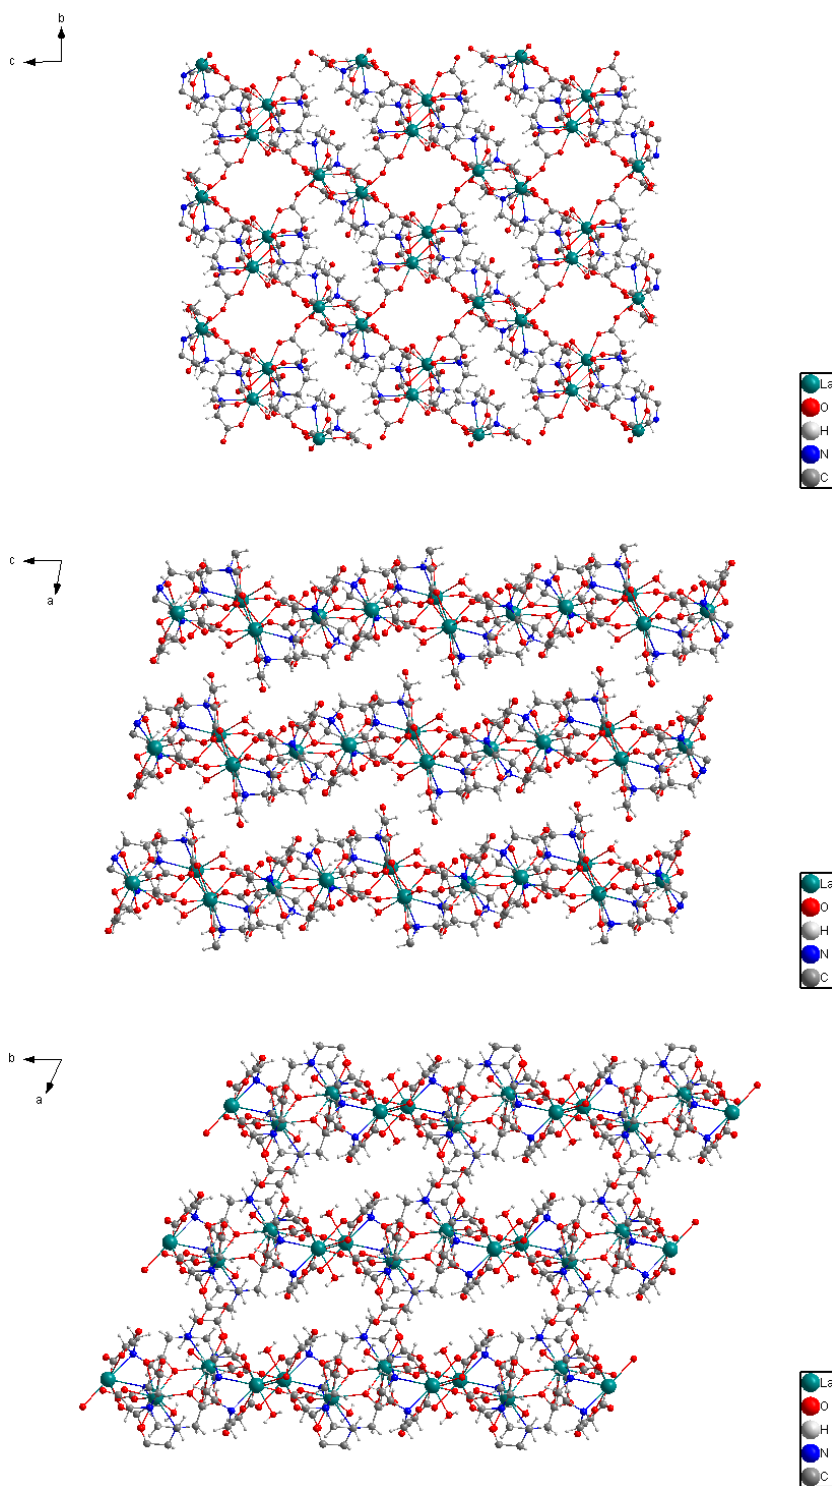

**Figure S7.** Schematic descriptions of the equivalent topology frameworks in  $(\text{H}_2\text{en})_n[\text{La}(\text{edta})(\text{H}_2\text{O})]_{2n} \cdot 10n\text{H}_2\text{O}$  (**3**) viewed along  $c$  axis.

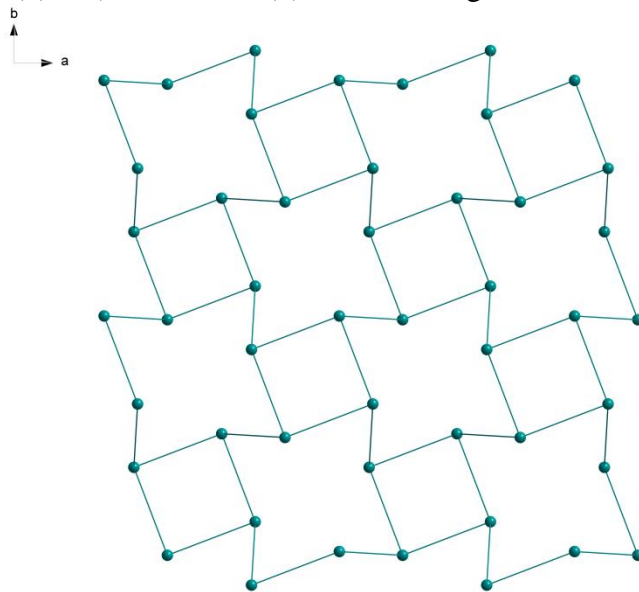

**Figure S8.** TG–DTG curves of  $[\text{La}(\text{Hida})_2(\text{H}_2\text{O})_2]_n \cdot n\text{Cl} \cdot 4n\text{H}_2\text{O}$  (**1**).

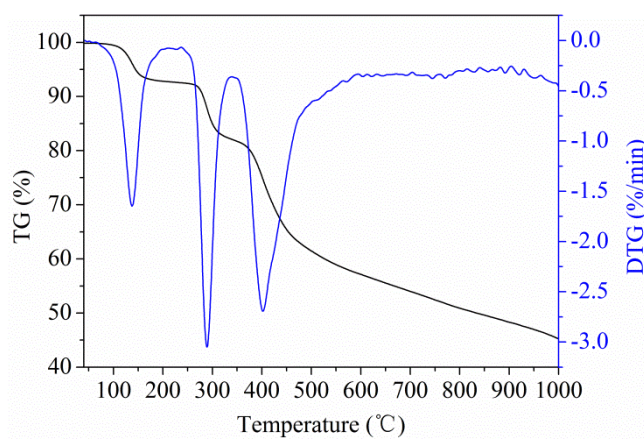



**Figure S9.** TG–DTG curves of  $K_{2n}[La(NTA)_2]_n \cdot nH_2O$  (2).

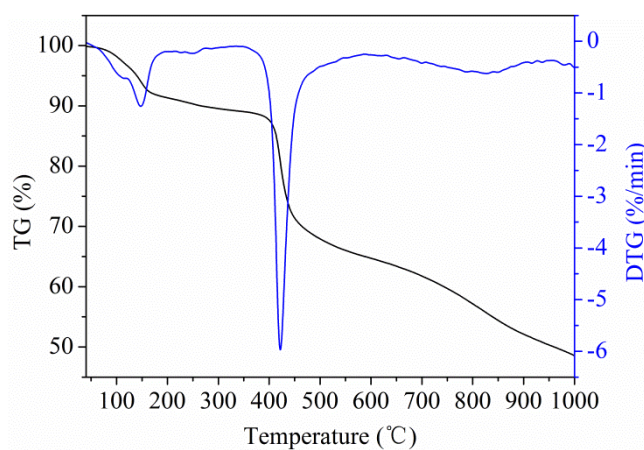

**Figure S10.** TG–DTG curves of  $(H_2en)_n[La(edta)(H_2O)]_{2n} \cdot 10nH_2O$  (3).

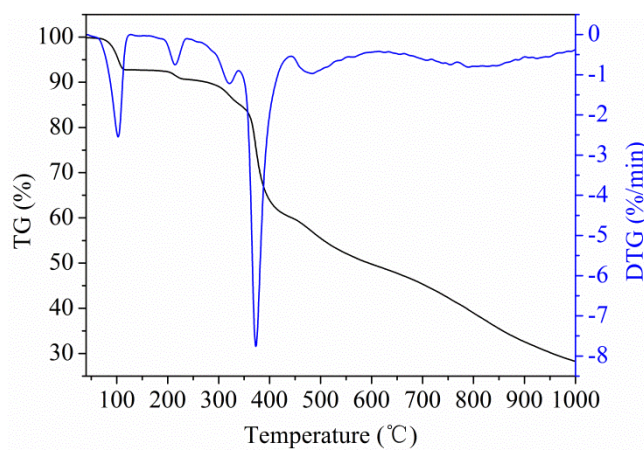

**Figure S11.** IR spectra of  $[\text{La}(\text{Hida})_2(\text{H}_2\text{O})_2]_n \cdot n\text{Cl} \cdot 4n\text{H}_2\text{O}$  (**1**),  $\text{K}_{2n}[\text{La}(\text{nta})_2]_n \cdot n\text{H}_2\text{O}$  (**2**) and  $(\text{H}_2\text{en})_n[\text{La}(\text{edta})(\text{H}_2\text{O})]_{2n} \cdot 10n\text{H}_2\text{O}$  (**3**).

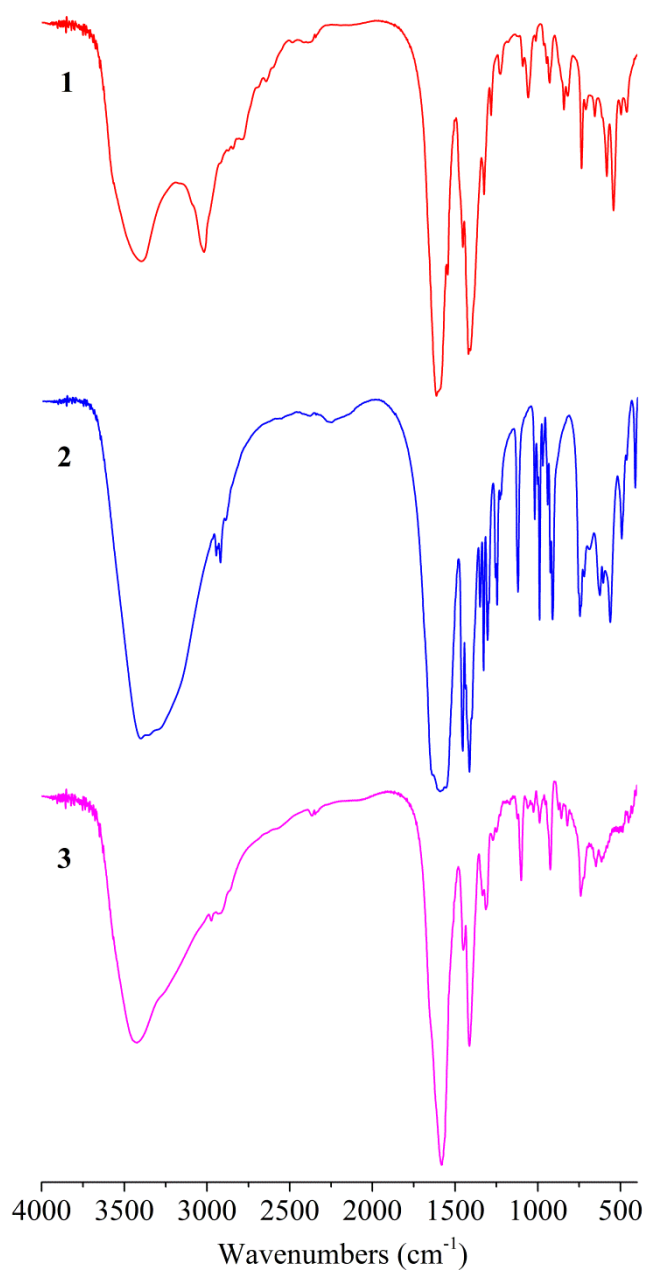

**Figure S12.** O<sub>2</sub>, CO<sub>2</sub>, CH<sub>4</sub>, N<sub>2</sub> and H<sub>2</sub> adsorption isotherms of (H<sub>2</sub>en)<sub>n</sub>[La(edta)(H<sub>2</sub>O)]<sub>2n</sub> · 10nH<sub>2</sub>O (**3**, a) and {La(H<sub>2</sub>O)<sub>4</sub>[La(1,3-pdta)(H<sub>2</sub>O)]<sub>3</sub> }<sub>n</sub> · 11.25nH<sub>2</sub>O (**4**, b) at 298 K.

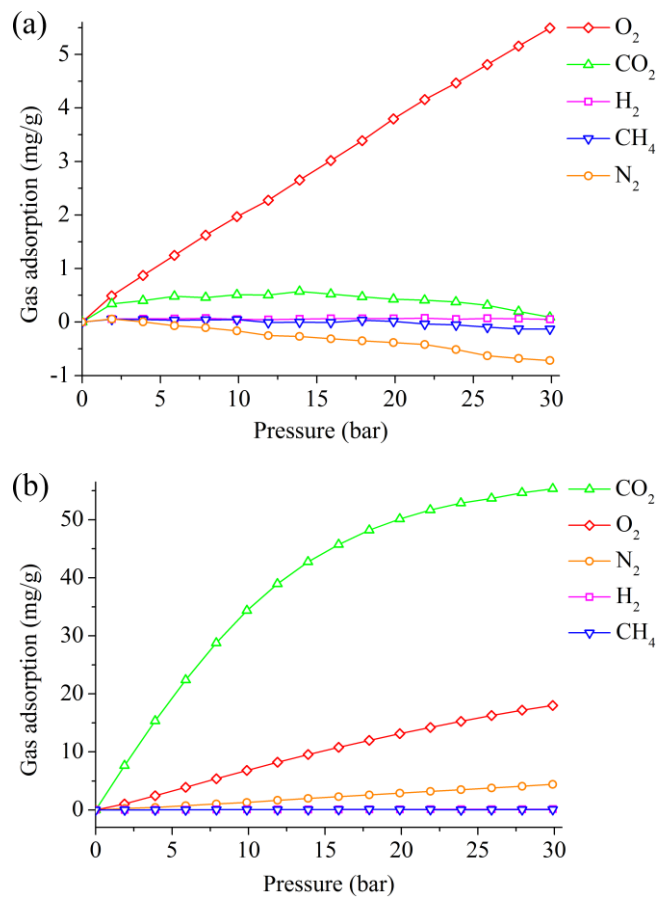

**Table S1.** Bond valence calculations for  $[\text{La}(\text{Hida})_2(\text{H}_2\text{O})_2]_n \cdot n\text{Cl} \cdot 4n\text{H}_2\text{O}$  (**1**),  $\text{K}_{2n}[\text{La}(\text{nta})_2]_n \cdot n\text{H}_2\text{O}$  (**2**) and  $(\text{H}_2\text{en})_n[\text{La}(\text{edta})(\text{H}_2\text{O})]_{2n} \cdot 10n\text{H}_2\text{O}$  (**3**).

| Complexes                                                                                                           | Atom  | N  | $\Sigma S_{ij}$ | $\Delta$ |
|---------------------------------------------------------------------------------------------------------------------|-------|----|-----------------|----------|
| $[\text{La}(\text{Hida})_2(\text{H}_2\text{O})_2]_n \cdot n\text{Cl} \cdot 4n\text{H}_2\text{O}$ ( <b>1</b> )       | La(1) | 3+ | 3.142           | 0.142    |
| $\text{K}_{2n}[\text{La}(\text{nta})_2]_n \cdot n\text{H}_2\text{O}$ ( <b>2</b> )                                   | La(1) | 3+ | 3.148           | 0.148    |
|                                                                                                                     | La(1) | 3+ | 3.281           | 0.281    |
| $(\text{H}_2\text{en})_n[\text{La}(\text{edta})(\text{H}_2\text{O})]_{2n} \cdot 10n\text{H}_2\text{O}$ ( <b>3</b> ) | La(2) | 3+ | 3.235           | 0.235    |

**Table S2.** Adsorption data of O<sub>2</sub>, CO<sub>2</sub>, CH<sub>4</sub>, N<sub>2</sub>, H<sub>2</sub> and desorption data of O<sub>2</sub> (mg/g) of (H<sub>2</sub>en)<sub>n</sub>[La(edta)(H<sub>2</sub>O)]<sub>2n</sub>·10nH<sub>2</sub>O (**3**) at 298 K under different pressure respectively.

| Press<br>(bar) | O <sub>2</sub> | CO <sub>2</sub> | CH <sub>4</sub> | N <sub>2</sub> | H <sub>2</sub> | Press<br>(bar) | O <sub>2</sub> |
|----------------|----------------|-----------------|-----------------|----------------|----------------|----------------|----------------|
| 0.00           | 0.00           | 0.00            | 0.00            | 0.00           | 0.00           | 29.90          | 5.49           |
| 1.89           | 0.49           | 0.34            | 0.05            | 0.06           | 0.06           | 27.90          | 5.15           |
| 3.89           | 0.87           | 0.40            | 0.05            | 0.00           | 0.06           | 25.89          | 4.80           |
| 5.90           | 1.25           | 0.48            | 0.03            | -0.07          | 0.06           | 23.90          | 4.45           |
| 7.90           | 1.62           | 0.46            | 0.04            | -0.11          | 0.07           | 21.90          | 4.14           |
| 9.90           | 1.97           | 0.51            | 0.04            | -0.16          | 0.05           | 19.89          | 3.77           |
| 11.90          | 2.28           | 0.51            | -0.01           | -0.25          | 0.05           | 17.90          | 3.35           |
| 13.89          | 2.65           | 0.57            | 0.00            | -0.27          | 0.05           | 15.89          | 2.98           |
| 15.89          | 3.02           | 0.52            | -0.01           | -0.31          | 0.06           | 13.89          | 2.61           |
| 17.90          | 3.39           | 0.47            | 0.03            | -0.35          | 0.07           | 11.90          | 2.22           |
| 19.90          | 3.80           | 0.43            | 0.01            | -0.38          | 0.06           | 9.89           | 1.91           |
| 21.90          | 4.16           | 0.41            | -0.04           | -0.42          | 0.07           | 7.90           | 1.56           |
| 23.90          | 4.47           | 0.38            | -0.05           | -0.51          | 0.05           | 5.90           | 1.18           |
| 25.90          | 4.81           | 0.31            | -0.10           | -0.63          | 0.07           | 3.89           | 0.80           |
| 27.90          | 5.16           | 0.20            | -0.13           | -0.68          | 0.06           | 1.90           | 0.41           |
| 29.90          | 5.49           | 0.09            | -0.13           | -0.72          | 0.05           | 0.00           | 0.00           |

**Table S3.** Adsorption data of O<sub>2</sub>, CO<sub>2</sub>, CH<sub>4</sub>, N<sub>2</sub>, H<sub>2</sub> and desorption data of O<sub>2</sub>, CO<sub>2</sub> (mg/g) of {La(H<sub>2</sub>O)<sub>4</sub>[La(1,3-pdta)(H<sub>2</sub>O)]<sub>3</sub>}<sub>n</sub> · 11.25nH<sub>2</sub>O (**4**) at 298 K under different pressure respectively.

| Press<br>(bar) | O <sub>2</sub> | CO <sub>2</sub> | CH <sub>4</sub> | N <sub>2</sub> | H <sub>2</sub> | Press<br>(bar) | O <sub>2</sub> | CO <sub>2</sub> |
|----------------|----------------|-----------------|-----------------|----------------|----------------|----------------|----------------|-----------------|
| 0.00           | 0.00           | 0.00            | 0.00            | 0.00           | 0.00           | 29.89          | 18.01          | 55.33           |
| 1.89           | 1.04           | 7.65            | 0.02            | 0.27           | 0.01           | 27.89          | 17.20          | 53.67           |
| 3.89           | 2.45           | 15.36           | 0.02            | 0.43           | 0.02           | 25.89          | 16.27          | 52.02           |
| 5.90           | 3.91           | 22.40           | 0.03            | 0.75           | 0.03           | 23.89          | 15.25          | 50.34           |
| 7.90           | 5.40           | 28.78           | 0.05            | 1.04           | 0.06           | 21.89          | 14.20          | 48.46           |
| 9.90           | 6.82           | 34.35           | 0.04            | 1.31           | 0.08           | 19.89          | 13.14          | 46.77           |
| 11.90          | 8.23           | 38.96           | 0.05            | 1.66           | 0.06           | 17.89          | 11.98          | 45.26           |
| 13.89          | 9.56           | 42.74           | 0.04            | 2.01           | 0.07           | 15.89          | 10.78          | 43.39           |
| 15.89          | 10.81          | 45.74           | 0.07            | 2.30           | 0.06           | 13.89          | 9.52           | 41.02           |
| 17.90          | 12.00          | 48.22           | 0.09            | 2.60           | 0.09           | 11.89          | 8.18           | 38.06           |
| 19.90          | 13.16          | 50.15           | 0.09            | 2.91           | 0.08           | 9.89           | 6.77           | 34.09           |
| 21.90          | 14.23          | 51.69           | 0.06            | 3.21           | 0.09           | 7.89           | 5.34           | 28.49           |
| 23.90          | 15.26          | 52.88           | 0.03            | 3.49           | 0.10           | 5.89           | 3.84           | 22.13           |
| 25.90          | 16.28          | 53.68           | 0.05            | 3.78           | 0.12           | 3.89           | 2.38           | 15.02           |
| 27.90          | 17.20          | 54.65           | 0.06            | 4.09           | 0.11           | 1.89           | 0.97           | 6.78            |
| 29.90          | 18.01          | 55.33           | 0.08            | 4.41           | 0.13           | 0.00           | 0.00           | 0.00            |

**Table S4.** Solid state  $^{13}\text{C}$  NMR data for  $[\text{La}(\text{Hida})_2(\text{H}_2\text{O})_2]_n \cdot n\text{Cl} \cdot 4n\text{H}_2\text{O}$  (**1**),  $\text{K}_{2n}[\text{La}(\text{nta})_2]_n \cdot n\text{H}_2\text{O}$  (**2**) and  $(\text{H}_2\text{en})_n[\text{La}(\text{edta})(\text{H}_2\text{O})]_{2n} \cdot 10n\text{H}_2\text{O}$  (**3**).

| Complexes                                                                                                              | $-\text{CH}_2\text{N}/-\text{CH}_2\text{CO}_2$ | $-\text{CO}_2$          |
|------------------------------------------------------------------------------------------------------------------------|------------------------------------------------|-------------------------|
| $[\text{La}(\text{Hida})_2(\text{H}_2\text{O})_2]_n \cdot n\text{Cl} \cdot 4n\text{H}_2\text{O}$ ( <b>1</b> )          | 46.0/49.6                                      | 170.7/174.2/175.4/177.3 |
| $\text{K}_{2n}[\text{La}(\text{nta})_2]_n \cdot n\text{H}_2\text{O}$ ( <b>2</b> )                                      | 64.4/68.1                                      | 178.4/180.5/183.7       |
| $(\text{H}_2\text{en})_n[\text{La}(\text{edta})(\text{H}_2\text{O})]_{2n} \cdot 10n\text{H}_2\text{O}$<br>( <b>3</b> ) | 59.2/64.2/66.6/67.9                            | 178.7/180.6/183.9       |

**Table S5.** Crystallographic data and structural refinements for [La(Hida)<sub>2</sub>(H<sub>2</sub>O)<sub>2</sub>]<sub>n</sub> nCl 4nH<sub>2</sub>O (1), K<sub>2n</sub>[La(nta)<sub>2</sub>]<sub>n</sub> nH<sub>2</sub>O (2) and (H<sub>2</sub>en)<sub>n</sub>[La(edta)(H<sub>2</sub>O)]<sub>2n</sub> ·10nH<sub>2</sub>O (3).

| Identification code                  | 1                                                                 | 2                                                                               | 3                                                                              |
|--------------------------------------|-------------------------------------------------------------------|---------------------------------------------------------------------------------|--------------------------------------------------------------------------------|
| Empirical formula                    | C <sub>8</sub> H <sub>24</sub> ClLaN <sub>2</sub> O <sub>14</sub> | C <sub>12</sub> H <sub>14</sub> K <sub>2</sub> LaN <sub>2</sub> O <sub>13</sub> | C <sub>22</sub> H <sub>58</sub> La <sub>2</sub> N <sub>6</sub> O <sub>28</sub> |
| Formula weight                       | 546.65                                                            | 611.37                                                                          | 1132.56                                                                        |
| Temperature/K                        | 173                                                               | 293(2)                                                                          | 193                                                                            |
| Crystal system                       | orthorhombic                                                      | cubic                                                                           | triclinic                                                                      |
| Space group                          | <i>P bca</i>                                                      | <i>P 2<sub>1</sub>3</i>                                                         | <i>P 1</i>                                                                     |
| <i>a</i> /Å                          | 8.8281(4)                                                         | 12.3762(2)                                                                      | 13.0217(4)                                                                     |
| <i>b</i> /Å                          | 19.2494(8)                                                        | 12.3762(2)                                                                      | 13.1618(6)                                                                     |
| <i>c</i> /Å                          | 22.482(2)                                                         | 12.3762(2)                                                                      | 14.0976(7)                                                                     |
| <i>α</i> /°                          | 90                                                                | 90                                                                              | 114.764(5)                                                                     |
| <i>β</i> /°                          | 90                                                                | 90                                                                              | 92.033(3)                                                                      |
| <i>γ</i> /°                          | 90                                                                | 90                                                                              | 103.503(4)                                                                     |
| Volume/Å <sup>3</sup>                | 3820.5(4)                                                         | 1895.67(9)                                                                      | 2108.9(2)                                                                      |
| Crystal size/mm <sup>3</sup>         | 0.3 × 0.2 × 0.04                                                  | 0.2 × 0.2 × 0.17                                                                | 0.2 × 0.2 × 0.1                                                                |
| Radiation (Å)                        | MoKα (λ = 0.71073)                                                | MoKα (λ = 0.71073)                                                              | MoKα (λ = 0.71073)                                                             |
| Dx, g cm <sup>-3</sup>               | 1.901                                                             | 2.142                                                                           | 1.784                                                                          |
| <i>Z</i>                             | 8                                                                 | 4                                                                               | 2                                                                              |
| Mu (mm <sup>-1</sup> )               | 2.446                                                             | 2.766                                                                           | 2.097                                                                          |
| F(000)                               | 2176.0                                                            | 1196.0                                                                          | 1140.0                                                                         |
| h,k,lmax                             | 12,26,29                                                          | 17,17,17                                                                        | 17,17,18                                                                       |
| Nref                                 | 4800                                                              | 1650                                                                            | 9381                                                                           |
| Tmin,Tmax                            | 0.854,1.000                                                       | 0.991,1.000                                                                     | 0.778,0.811                                                                    |
| Data completeness                    | 0.860                                                             | 1.64/0.92                                                                       | 0.872                                                                          |
| Theta(max)                           | 30.019                                                            | 29.659                                                                          | 28.577                                                                         |
| <i>R</i> (reflections)               | 0.0326(4057)                                                      | 0.0380(1577)                                                                    | 0.0376(7566)                                                                   |
| <i>wR</i> <sub>2</sub> (reflections) | 0.0815(4800)                                                      | 0.0802(1650)                                                                    | 0.0853(9381)                                                                   |
| <i>S</i>                             | 1.088                                                             | 1.132                                                                           | 1.049                                                                          |
| Npar                                 | 249                                                               | 92                                                                              | 441                                                                            |



**Table S6.** Selected bond distances ( Å ) and angles ( ° ) for [La(Hida)<sub>2</sub>(H<sub>2</sub>O)<sub>2</sub>]<sub>n</sub> nCl 4nH<sub>2</sub>O (1).

|                   |           |                    |           |
|-------------------|-----------|--------------------|-----------|
| La(1)–O(1)        | 2.481(2)  | La(1)–C(5b)        | 3.043(3)  |
| La(1)–O(2a)       | 2.532(2)  | La(1)–C(7c)        | 3.055(3)  |
| La(1)–O(5)        | 2.505(2)  | La(1a)–O(5)        | 2.745(2)  |
| La(1)–O(5b)       | 2.745(2)  | La(1a)–O(6)        | 2.611(2)  |
| La(1)–O(6b)       | 2.611(2)  | La(1b)–O(2)        | 2.532(2)  |
| La(1)–O(7c)       | 2.746(2)  | La(1e)–O(7)        | 2.524(2)  |
| La(1)–O(7d)       | 2.524(2)  | La(1f)–O(7)        | 2.746(2)  |
| La(1)–O(8c)       | 2.644(2)  | La(1f)–O(8)        | 2.644(2)  |
| La(1)–O(1W)       | 2.722(2)  | La(1a)–C(5)        | 3.043(3)  |
| La(1)–O(2W)       | 2.614(2)  | La(1f)–C(7)        | 3.055(3)  |
| O(1)–La(1)–O(2a)  | 136.92(8) | O(6b)–La(1)–O(1W)  | 70.21(7)  |
| O(1)–La(1)–O(5)   | 139.34(8) | O(6b)–La(1)–O(2W)  | 70.79(8)  |
| O(1)–La(1)–O(5b)  | 67.02(8)  | O(6b)–La(1)–C(5b)  | 23.90(8)  |
| O(1)–La(1)–O(6b)  | 84.94(8)  | O(6b)–La(1)–C(7c)  | 142.67(8) |
| O(1)–La(1)–O(7c)  | 103.98(8) | O(7c)–La(1)–O(7d)  | 123.21(9) |
| O(1)–La(1)–O(7d)  | 73.86(8)  | O(7c)–La(1)–O(8c)  | 48.30(7)  |
| O(1)–La(1)–O(8c)  | 72.38(8)  | O(7c)–La(1)–O(1W)  | 125.07(7) |
| O(1)–La(1)–O(1W)  | 130.92(8) | O(7c)–La(1)–O(2W)  | 63.31(7)  |
| O(1)–La(1)–O(2W)  | 67.15(8)  | O(7c)–La(1)–C(5b)  | 146.92(8) |
| O(1)–La(1)–C(5b)  | 74.58(9)  | O(7c)–La(1)–C(7c)  | 24.64(7)  |
| O(1)–La(1)–C(7c)  | 88.48(9)  | O(7d)–La(1)–O(8c)  | 79.64(8)  |
| O(2a)–La(1)–O(5)  | 78.29(8)  | O(7d)–La(1)–O(1W)  | 77.60(7)  |
| O(2a)–La(1)–O(5b) | 122.76(7) | O(7d)–La(1)–O(2W)  | 140.51(8) |
| O(2a)–La(1)–O(6b) | 134.99(8) | O(7d)–La(1)–C(5b)  | 88.70(8)  |
| O(2a)–La(1)–O(7c) | 69.83(7)  | O(7d)–La(1)–C(7c)  | 100.80(8) |
| O(2a)–La(1)–O(7d) | 75.24(7)  | O(8c)–La(1)–O(1W)  | 139.18(8) |
| O(2a)–La(1)–O(8c) | 73.13(8)  | O(8c)–La(1)–O(2W)  | 82.94(8)  |
| O(2a)–La(1)–O(1W) | 68.54(8)  | O(8c)–La(1)–C(5b)  | 146.85(8) |
| O(2a)–La(1)–O(2W) | 132.09(7) | O(8c)–La(1)–C(7c)  | 23.70(8)  |
| O(2a)–La(1)–C(5b) | 133.66(8) | O(1W)–La(1)–O(2W)  | 134.20(7) |
| O(2a)–La(1)–C(7c) | 68.73(9)  | O(1W)–La(1)–C(5b)  | 65.61(8)  |
| O(5)–La(1)–O(5b)  | 116.11(9) | O(1W)–La(1)–C(7c)  | 136.09(8) |
| O(5)–La(1)–O(6b)  | 73.39(8)  | O(2W)–La(1)–C(5b)  | 86.91(8)  |
| O(5)–La(1)–O(7c)  | 64.39(7)  | O(2W)–La(1)–C(7c)  | 72.79(8)  |
| O(5)–La(1)–O(7d)  | 146.19(8) | C(5b)–La(1)–C(7c)  | 157.57(9) |
| O(5)–La(1)–O(8c)  | 112.22(8) | La(1)–O(5)–La(1a)  | 115.21(9) |
| O(5)–La(1)–O(1W)  | 73.35(8)  | La(1e)–O(7)–La(1f) | 114.57(8) |
| O(5)–La(1)–O(2W)  | 73.30(8)  | O(5)–C(5)–La(1a)   | 64.4(2)   |
| O(5)–La(1)–C(5b)  | 94.69(8)  | O(6)–C(5)–La(1a)   | 58.2(2)   |
| O(5)–La(1)–C(7c)  | 88.64(8)  | O(7)–C(7)–La(1f)   | 63.9(2)   |
| O(5b)–La(1)–O(6b) | 48.54(7)  | O(8)–C(7)–La(1f)   | 59.2(2)   |

|                   |           |                  |          |
|-------------------|-----------|------------------|----------|
| O(5b)–La(1)–O(7c) | 167.40(7) | C(1)–O(1)–La(1)  | 142.9(2) |
| O(5b)–La(1)–O(7d) | 64.17(7)  | C(1)–O(2)–La(1b) | 135.3(2) |
| O(5b)–La(1)–O(8c) | 131.19(8) | C(5)–O(5)–La(1)  | 153.4(2) |
| O(5b)–La(1)–O(1W) | 64.78(7)  | C(5)–O(5)–La(1a) | 90.9(2)  |
| O(5b)–La(1)–O(2W) | 104.33(7) | C(5)–O(6)–La(1a) | 97.9(2)  |
| O(5b)–La(1)–C(5b) | 24.65(8)  | C(7)–O(7)–La(1e) | 146.6(2) |
| O(5b)–La(1)–C(7c) | 153.63(8) | C(7)–O(7)–La(1f) | 91.4(2)  |
| O(6b)–La(1)–O(7c) | 124.07(7) | C(7)–O(8)–La(1f) | 97.1(2)  |
| O(6b)–La(1)–O(7d) | 112.41(7) | C(6)–C(5)–La(1a) | 177.1(2) |
| O(6b)–La(1)–O(8c) | 150.52(8) | C(8)–C(7)–La(1f) | 176.5(2) |

Symmetry codes: (a)  $-\frac{1}{2} + x, y, \frac{1}{2} - z$ ; (b)  $\frac{1}{2} + x, y, \frac{1}{2} - z$ ; (c)  $-x, -\frac{1}{2} + y, \frac{1}{2} - z$ ; (d)  $\frac{1}{2} - x, -\frac{1}{2} + y, z$ ;  
(e)  $\frac{1}{2} - x, \frac{1}{2} + y, z$ ; (f)  $-x, \frac{1}{2} + y, \frac{1}{2} - z$ ;

**Table S7.** Selected bond distances (Å) and angles (°) for  $K_{2n}[La(nta)_2]_n \cdot nH_2O$  (**2**).

|                   |          |                    |           |
|-------------------|----------|--------------------|-----------|
| La(1)–O(1)        | 2.542(5) | La(1)–O(4b)        | 2.631(5)  |
| La(1)–O(1a)       | 2.542(5) | La(1)–N(1)         | 2.68(1)   |
| La(1)–O(1b)       | 2.542(5) | La(1)–C(4)         | 2.990(6)  |
| La(1)–O(3)        | 2.674(5) | La(1)–C(4a)        | 2.990(6)  |
| La(1)–O(3a)       | 2.674(5) | La(1c)–K(1)        | 3.959(3)  |
| La(1)–O(3b)       | 2.674(5) | La(1d)–K(2)        | 4.5610(9) |
| La(1)–O(4)        | 2.631(5) | La(1e)–K(2)        | 4.5610(9) |
| La(1)–O(4a)       | 2.631(5) |                    |           |
| O(1)–La(1)–O(1a)  | 100.4(2) | O(4a)–La(1)–O(4b)  | 116.04(7) |
| O(1)–La(1)–O(1b)  | 100.4(2) | O(4a)–La(1)–N(1)   | 101.6(1)  |
| O(1)–La(1)–O(3)   | 75.2(2)  | O(4a)–La(1)–C(4)   | 93.7(2)   |
| O(1)–La(1)–O(3a)  | 116.5(2) | O(4a)–La(1)–C(4a)  | 24.6(2)   |
| O(1)–La(1)–O(3b)  | 143.1(2) | O(4b)–La(1)–N(1)   | 101.6(1)  |
| O(1)–La(1)–O(4)   | 71.4(2)  | O(4b)–La(1)–C(4)   | 123.8(2)  |
| O(1)–La(1)–O(4a)  | 68.7(2)  | O(4b)–La(1)–C(4a)  | 93.7(2)   |
| O(1)–La(1)–O(4b)  | 164.1(2) | N(1)–La(1)–C(4)    | 118.4(2)  |
| O(1)–La(1)–N(1)   | 62.5(1)  | N(1)–La(1)–C(4a)   | 118.4(1)  |
| O(1)–La(1)–C(4)   | 69.2(2)  | C(4)–La(1)–C(4a)   | 99.2(2)   |
| O(1)–La(1)–C(4a)  | 92.9(2)  | O(2)–K(1)–La(1c)   | 114.5(2)  |
| O(1a)–La(1)–O(1b) | 100.4(2) | O(2h)–K(1)–La(1c)  | 114.5(2)  |
| O(1a)–La(1)–O(3)  | 143.1(2) | O(2i)–K(1)–La(1c)  | 114.5(2)  |
| O(1a)–La(1)–O(3a) | 75.2(2)  | O(3c)–K(1)–La(1c)  | 42.4(1)   |
| O(1a)–La(1)–O(3b) | 116.5(2) | O(3f)–K(1)–La(1c)  | 42.4(1)   |
| O(1a)–La(1)–O(4)  | 164.1(2) | O(3g)–K(1)–La(1c)  | 42.4(1)   |
| O(1a)–La(1)–O(4a) | 71.4(2)  | C(2)–K(1)–La(1c)   | 104.7(1)  |
| O(1a)–La(1)–O(4b) | 68.7(2)  | C(2h)–K(1)–La(1c)  | 104.7(1)  |
| O(1a)–La(1)–N(1)  | 62.5(1)  | C(2i)–K(1)–La(1c)  | 104.7(1)  |
| O(1a)–La(1)–C(4)  | 164.5(2) | La(1)–K(2)–La(1d)  | 112.52(3) |
| O(1a)–La(1)–C(4a) | 69.2(2)  | La(1)–K(2)–La(1e)  | 112.52(3) |
| O(1b)–La(1)–O(3)  | 116.5(2) | La(1d)–K(2)–La(1e) | 112.52(3) |
| O(1b)–La(1)–O(3a) | 143.1(2) | O(1)–K(2)–La(1)    | 30.3(1)   |
| O(1b)–La(1)–O(3b) | 75.2(2)  | O(1)–K(2)–La(1d)   | 135.0(1)  |
| O(1b)–La(1)–O(4)  | 68.7(2)  | O(1)–K(2)–La(1e)   | 108.2(1)  |
| O(1b)–La(1)–O(4a) | 164.1(2) | O(1k)–K(2)–La(1)   | 135.0(1)  |
| O(1b)–La(1)–O(4b) | 71.4(2)  | O(1k)–K(2)–La(1d)  | 108.2(1)  |
| O(1b)–La(1)–N(1)  | 62.5(1)  | O(1k)–K(2)–La(1e)  | 30.3(1)   |
| O(1b)–La(1)–C(4)  | 92.9(2)  | O(1l)–K(2)–La(1)   | 108.2(1)  |
| O(1b)–La(1)–C(4a) | 164.5(2) | O(1l)–K(2)–La(1d)  | 30.3(1)   |
| O(3)–La(1)–O(3a)  | 74.6(2)  | O(1l)–K(2)–La(1e)  | 135.0(1)  |
| O(3)–La(1)–O(3b)  | 74.6(2)  | O(4a)–K(2)–La(1)   | 32.4(1)   |
| O(3)–La(1)–O(4)   | 49.5(1)  | O(4a)–K(2)–La(1d)  | 93.8(1)   |
| O(3)–La(1)–O(4a)  | 73.0(2)  | O(4a)–K(2)–La(1e)  | 98.8(1)   |

|                   |           |                   |           |
|-------------------|-----------|-------------------|-----------|
| O(3)–La(1)–O(4b)  | 120.6(2)  | O(4d)–K(2)–La(1)  | 98.8(1)   |
| O(3)–La(1)–N(1)   | 135.6(1)  | O(4d)–K(2)–La(1d) | 32.4(1)   |
| O(3)–La(1)–C(4)   | 25.1(2)   | O(4d)–K(2)–La(1e) | 93.8(1)   |
| O(3)–La(1)–C(4a)  | 74.5(2)   | O(4j)–K(2)–La(1)  | 93.8(1)   |
| O(3a)–La(1)–O(3b) | 74.6(2)   | O(4j)–K(2)–La(1d) | 98.8(1)   |
| O(3a)–La(1)–O(4)  | 120.6(2)  | O(4j)–K(2)–La(1e) | 32.4(1)   |
| O(3a)–La(1)–O(4a) | 49.5(1)   | O(1W)–K(2)–La(1)  | 106.22(4) |
| O(3a)–La(1)–O(4b) | 73.0(2)   | O(1W)–K(2)–La(1d) | 106.22(4) |
| O(3a)–La(1)–N(1)  | 135.6(1)  | O(1W)–K(2)–La(1e) | 106.22(4) |
| O(3a)–La(1)–C(4)  | 98.8(2)   | La(1)–O(1)–K(2)   | 115.3(2)  |
| O(3a)–La(1)–C(4a) | 25.1(2)   | La(1)–O(4)–K(2c)  | 111.8(2)  |
| O(3b)–La(1)–O(4)  | 73.0(2)   | La(1)–O(3)–K(1d)  | 93.2(2)   |
| O(3b)–La(1)–O(4a) | 120.6(2)  | O(3)–C(4)–La(1)   | 63.4(3)   |
| O(3b)–La(1)–O(4b) | 49.5(1)   | O(4)–C(4)–La(1)   | 61.4(3)   |
| O(3b)–La(1)–N(1)  | 135.6(1)  | C(1)–N(1)–La(1)   | 108.3(5)  |
| O(3b)–La(1)–C(4)  | 74.5(2)   | C(1a)–N(1)–La(1)  | 108.3(5)  |
| O(3b)–La(1)–C(4a) | 98.8(2)   | C(1b)–N(1)–La(1)  | 108.3(5)  |
| O(4)–La(1)–O(4a)  | 116.04(7) | C(2)–O(1)–La(1)   | 120.7(4)  |
| O(4)–La(1)–O(4b)  | 116.04(7) | C(3)–C(4)–La(1)   | 170.6(5)  |
| O(4)–La(1)–N(1)   | 101.6(1)  | C(4)–O(3)–La(1)   | 91.5(4)   |
| O(4)–La(1)–C(4)   | 24.6(2)   | C(4)–O(4)–La(1)   | 94.0(4)   |
| O(4)–La(1)–C(4a)  | 123.8(2)  |                   |           |

Symmetry codes: (a)  $y, z, x$ ; (b)  $z, x, y$ ; (c)  $1 - x, \frac{1}{2} + y, \frac{1}{2} - z$ ; (d)  $1 - x, -\frac{1}{2} + y, \frac{1}{2} - z$ ; (e)  $\frac{1}{2} + x, \frac{1}{2} - y, 1 - z$ ; (f)  $1 - z, \frac{1}{2} + x, \frac{1}{2} - y$ ; (g)  $1 - y, \frac{1}{2} + z, \frac{1}{2} - x$ ; (h)  $1\frac{1}{2} - y, 1 - z, -\frac{1}{2} + x$ ; (i)  $\frac{1}{2} + z, 1\frac{1}{2} - x, 1 - y$ ; (j)  $\frac{1}{2} + z, \frac{1}{2} - x, 1 - y$ ; (k)  $\frac{1}{2} + y, \frac{1}{2} - z, 1 - x$ ; (l)  $1 - z, -\frac{1}{2} + x, \frac{1}{2} - y$ ;

**Table S8.** Selected bond distances ( Å ) and angles ( ° ) for (H<sub>2</sub>en)<sub>n</sub>[La(edta)(H<sub>2</sub>O)]<sub>2n</sub>·10nH<sub>2</sub>O (**3**).

|                   |          |                     |          |
|-------------------|----------|---------------------|----------|
| La(1)–O(1)        | 2.564(4) | La(2)–O(11)         | 2.476(8) |
| La(1)–O(3)        | 2.500(5) | La(2)–O(13)         | 2.534(7) |
| La(1)–O(5)        | 2.454(5) | La(2)–O(15)         | 2.519(5) |
| La(1)–O(7)        | 2.583(4) | La(2)–O(2W)         | 2.547(5) |
| La(1)–O(7a)       | 2.656(4) | La(2)–N(3)          | 2.854(6) |
| La(1)–O(8a)       | 2.724(5) | La(2)–N(4)          | 2.835(6) |
| La(1)–O(16b)      | 2.536(5) | La(2)–C(11c)        | 3.093(9) |
| La(1)–O(1W)       | 2.552(4) | La(1a)–O(7)         | 2.656(4) |
| La(1)–N(1)        | 2.859(5) | La(1a)–O(8)         | 2.723(5) |
| La(1)–N(2)        | 2.848(5) | La(1a)–C(9)         | 3.049(7) |
| La(1)–C(9a)       | 3.049(7) | La(1b)–O(16)        | 2.536(5) |
| La(2)–O(2)        | 2.537(5) | La(2c)–O(9)         | 2.691(6) |
| La(2)–O(9)        | 2.572(6) | La(2c)–O(10)        | 2.773(7) |
| La(2)–O(9c)       | 2.691(6) | La(2c)–C(11)        | 3.093(9) |
| La(2)–O(10c)      | 2.773(7) |                     |          |
| O(1)–La(1)–O(3)   | 79.3(2)  | O(9)–La(2)–N(4)     | 88.4(2)  |
| O(1)–La(1)–O(5)   | 78.8(1)  | O(9)–La(2)–C(11c)   | 79.6(2)  |
| O(1)–La(1)–O(7)   | 144.4(1) | O(9c)–La(2)–O(10c)  | 47.2(2)  |
| O(1)–La(1)–O(7a)  | 121.6(1) | O(9c)–La(2)–O(11)   | 150.6(2) |
| O(1)–La(1)–O(8a)  | 73.6(2)  | O(9c)–La(2)–O(13)   | 76.3(2)  |
| O(1)–La(1)–O(16b) | 70.7(2)  | O(9c)–La(2)–O(15)   | 120.3(2) |
| O(1)–La(1)–O(1W)  | 144.5(1) | O(9c)–La(2)–O(2W)   | 71.8(2)  |
| O(1)–La(1)–N(1)   | 59.7(2)  | O(9c)–La(2)–N(3)    | 115.5(2) |
| O(1)–La(1)–N(2)   | 120.3(2) | O(9c)–La(2)–N(4)    | 136.5(2) |
| O(1)–La(1)–C(9a)  | 97.4(2)  | O(9c)–La(2)–C(11c)  | 24.3(2)  |
| O(3)–La(1)–O(5)   | 133.2(2) | O(11)–La(2)–O(10c)  | 136.0(2) |
| O(3)–La(1)–O(7)   | 65.9(1)  | O(10c)–La(2)–O(13)  | 67.1(2)  |
| O(3)–La(1)–O(7a)  | 82.4(1)  | O(10c)–La(2)–O(15)  | 74.0(2)  |
| O(3)–La(1)–O(8a)  | 72.4(2)  | O(10c)–La(2)–O(2W)  | 106.4(2) |
| O(3)–La(1)–O(16b) | 135.2(2) | O(10c)–La(2)–N(3)   | 161.3(2) |
| O(3)–La(1)–O(1W)  | 136.0(2) | O(10c)–La(2)–N(4)   | 121.5(2) |
| O(3)–La(1)–N(1)   | 63.1(2)  | O(10c)–La(2)–C(11c) | 23.7(2)  |
| O(3)–La(1)–N(2)   | 95.4(2)  | O(11)–La(2)–O(13)   | 133.1(2) |
| O(3)–La(1)–C(9a)  | 72.9(2)  | O(11)–La(2)–O(15)   | 77.8(2)  |
| O(5)–La(1)–O(7)   | 120.2(1) | O(11)–La(2)–O(2W)   | 81.3(2)  |
| O(5)–La(1)–O(7a)  | 143.8(1) | O(11)–La(2)–N(3)    | 62.1(2)  |
| O(5)–La(1)–O(8a)  | 137.2(1) | O(11)–La(2)–N(4)    | 71.1(2)  |
| O(5)–La(1)–O(16b) | 72.6(2)  | O(11)–La(2)–C(11c)  | 154.1(2) |
| O(5)–La(1)–O(1W)  | 77.1(1)  | O(13)–La(2)–O(15)   | 72.1(2)  |
| O(5)–La(1)–N(1)   | 70.1(1)  | O(13)–La(2)–O(2W)   | 138.7(2) |
| O(5)–La(1)–N(2)   | 62.3(1)  | O(13)–La(2)–N(3)    | 104.8(2) |

|                    |          |                    |          |
|--------------------|----------|--------------------|----------|
| O(5)–La(1)–C(9a)   | 150.8(2) | O(13)–La(2)–N(4)   | 63.4(2)  |
| O(7)–La(1)–O(7a)   | 62.2(2)  | O(13)–La(2)–C(11c) | 65.6(2)  |
| O(7)–La(1)–O(8a)   | 100.9(1) | O(15)–La(2)–O(2W)  | 147.9(2) |
| O(7)–La(1)–O(16b)  | 141.0(1) | O(15)–La(2)–N(3)   | 120.8(2) |
| O(7)–La(1)–O(1W)   | 71.0(1)  | O(15)–La(2)–N(4)   | 63.0(2)  |
| O(7)–La(1)–N(1)    | 96.5(1)  | O(15)–La(2)–C(11c) | 96.1(2)  |
| O(7)–La(1)–N(2)    | 59.5(1)  | O(2W)–La(2)–N(3)   | 67.8(2)  |
| O(7)–La(1)–C(9a)   | 79.5(1)  | O(2W)–La(2)–N(4)   | 131.2(2) |
| O(7a)–La(1)–O(8a)  | 48.0(1)  | O(2W)–La(2)–C(11c) | 92.2(2)  |
| O(7a)–La(1)–O(16b) | 85.9(2)  | N(3)–La(2)–N(4)    | 63.9(2)  |
| O(7a)–La(1)–O(1W)  | 70.0(1)  | N(3)–La(2)–C(11c)  | 138.0(2) |
| O(7a)–La(1)–N(1)   | 145.1(1) | N(4)–La(2)–C(11c)  | 128.6(2) |
| O(7a)–La(1)–N(2)   | 116.3(1) | La(1)–O(7)–La(1a)  | 117.8(2) |
| O(7a)–La(1)–C(9a)  | 24.4(1)  | C(1)–O(1)–La(1)    | 123.1(4) |
| O(8a)–La(1)–O(16b) | 67.8(2)  | C(3)–O(3)–La(1)    | 129.4(5) |
| O(8a)–La(1)–O(1W)  | 108.7(2) | C(7)–O(5)–La(1)    | 131.0(4) |
| O(8a)–La(1)–N(1)   | 119.2(1) | C(9)–O(7)–La(1)    | 122.6(4) |
| O(8a)–La(1)–N(2)   | 160.3(1) | C(2)–N(1)–La(1)    | 106.1(3) |
| O(8a)–La(1)–C(9a)  | 24.1(1)  | C(4)–N(1)–La(1)    | 109.2(4) |
| O(16b)–La(1)–O(1W) | 77.5(2)  | C(5)–N(1)–La(1)    | 110.6(3) |
| O(16b)–La(1)–N(1)  | 122.0(2) | C(6)–N(2)–La(1)    | 104.9(3) |
| O(16b)–La(1)–N(2)  | 128.2(2) | C(8)–N(2)–La(1)    | 110.4(3) |
| O(16b)–La(1)–C(9a) | 78.8(2)  | C(10)–N(2)–La(1)   | 110.7(4) |
| O(1W)–La(1)–N(1)   | 132.1(2) | C(9)–O(7)–La(1a)   | 95.5(4)  |
| O(1W)–La(1)–N(2)   | 69.1(1)  | C(9)–O(8)–La(1a)   | 92.7(4)  |
| O(1W)–La(1)–C(9a)  | 91.4(2)  | C(19)–O(16)–La(1b) | 151.3(5) |
| N(1)–La(1)–N(2)    | 65.1(1)  | La(2)–O(9)–La(2c)  | 118.4(2) |
| N(1)–La(1)–C(9a)   | 138.2(1) | C(1)–O(2)–La(2)    | 146.0(5) |
| N(2)–La(1)–C(9a)   | 132.9(2) | C(11)–O(9)–La(2)   | 124.5(6) |
| O(2)–La(2)–O(9)    | 139.1(2) | C(13)–O(11)–La(2)  | 130.3(7) |
| O(2)–La(2)–O(9c)   | 87.7(2)  | C(17)–O(13)–La(2)  | 126.8(6) |
| O(2)–La(2)–O(10c)  | 68.7(2)  | C(19)–O(15)–La(2)  | 128.4(5) |
| O(2)–La(2)–O(11)   | 72.9(2)  | C(12)–N(3)–La(2)   | 109.5(5) |
| O(2)–La(2)–O(13)   | 131.8(2) | C(14)–N(3)–La(2)   | 108.4(5) |
| O(2)–La(2)–O(15)   | 78.1(2)  | C(15)–N(3)–La(2)   | 109.8(6) |
| O(2)–La(2)–O(2W)   | 72.6(2)  | C(16)–N(4)–La(2)   | 112.8(4) |
| O(2)–La(2)–N(3)    | 123.0(2) | C(18)–N(4)–La(2)   | 108.0(5) |
| O(2)–La(2)–N(4)    | 131.2(2) | C(20)–N(4)–La(2)   | 107.3(4) |
| O(2)–La(2)–C(11c)  | 81.2(2)  | O(7)–C(9)–La(1a)   | 60.1(3)  |
| O(9)–La(2)–O(9c)   | 61.6(2)  | O(8)–C(9)–La(1a)   | 63.1(4)  |
| O(9)–La(2)–O(10c)  | 102.0(2) | C(10)–C(9)–La(1a)  | 165.7(4) |
| O(9)–La(2)–O(11)   | 121.2(2) | C(11)–O(9)–La(2c)  | 95.8(5)  |
| O(9)–La(2)–O(13)   | 69.6(2)  | C(11)–O(10)–La(2c) | 92.7(5)  |
| O(9)–La(2)–O(15)   | 139.6(2) | O(9)–C(11)–La(2c)  | 60.0(5)  |

---

|                  |         |                    |          |
|------------------|---------|--------------------|----------|
| O(9)–La(2)–O(2W) | 72.4(2) | O(10)–C(11)–La(2c) | 63.6(5)  |
| O(9)–La(2)–N(3)  | 59.5(2) | C(12)–C(11)–La(2c) | 159.6(5) |

---

Symmetry codes: (a)  $1 - x, 2 - y, 2 - z$ ; (b)  $1 - x, 2 - y, 1 - z$ ; (c)  $1 - x, 1 - y, 1 - z$ ;

**Table S9.** Selected bond distances (Å) and angles (°) within the water layer in [La(Hida)<sub>2</sub>(H<sub>2</sub>O)<sub>2</sub>]<sub>n</sub> nCl 4nH<sub>2</sub>O (**1**).

| D-H···A                                 | D-H(Å) | H···A(Å) | D···A(Å) | D-H···A(°) |
|-----------------------------------------|--------|----------|----------|------------|
| O <sub>1w</sub> -H ··· O <sub>6wa</sub> | 0.89   | 1.95     | 2.810(4) | 163        |
| O <sub>1w</sub> -H ··· Cl <sub>1b</sub> | 0.89   | 2.35     | 3.196(3) | 159        |
| O <sub>2w</sub> -H ··· O <sub>4c</sub>  | 0.88   | 1.89     | 2.758(4) | 168        |
| O <sub>2w</sub> -H ··· O <sub>1wd</sub> | 0.88   | 2.03     | 2.865(4) | 157        |
| O <sub>3w</sub> -H ··· O <sub>2we</sub> | 0.85   | 2.24     | 3.071(4) | 165        |
| O <sub>3w</sub> -H ··· O <sub>4w</sub>  | 0.85   | 1.90     | 2.753(4) | 177        |
| O <sub>4w</sub> -H ··· O <sub>5w</sub>  | 0.85   | 1.95     | 2.767(4) | 162        |
| O <sub>4w</sub> -H ··· O <sub>6wf</sub> | 0.85   | 2.01     | 2.845(4) | 169        |
| O <sub>5w</sub> -H ··· O <sub>4f</sub>  | 0.85   | 1.96     | 2.801(4) | 174        |
| O <sub>5w</sub> -H ··· Cl <sub>1g</sub> | 0.85   | 2.30     | 3.148(3) | 177        |
| O <sub>6w</sub> -H ··· O <sub>3</sub>   | 0.85   | 1.95     | 2.777(4) | 164        |
| O <sub>6w</sub> -H ··· O <sub>4f</sub>  | 0.85   | 1.97     | 2.809(4) | 169        |
| N <sub>1</sub> -H ··· O <sub>3w</sub>   | 0.91   | 1.89     | 2.769(4) | 160        |
| N <sub>1</sub> -H ··· Cl <sub>1h</sub>  | 0.91   | 2.33     | 3.203(3) | 162        |
| N <sub>2</sub> -H ··· O <sub>5wa</sub>  | 0.91   | 1.91     | 2.814(4) | 174        |
| N <sub>2</sub> -H ··· Cl <sub>1</sub>   | 0.91   | 2.33     | 3.097(3) | 142        |

Symmetry codes: (a)  $1 - x, \frac{1}{2} + y, \frac{1}{2} - z$ ; (b)  $\frac{1}{2} + x, y, \frac{1}{2} - z$ ; (c)  $-\frac{1}{2} + x, \frac{1}{2} - y, 1 - z$ ; (d)  $-\frac{1}{2} + x, y, \frac{1}{2} - z$ ; (e)  $1 + x, y, z$ ; (f)  $2 - x, -y, 1 - z$ ; (g)  $1\frac{1}{2} - x, -\frac{1}{2} + y, z$ ; (h)  $\frac{1}{2} - x, -\frac{1}{2} + y, z$ ;



**Table S10.** Selected bond distances (Å) and angles (°) within the water layer in  $(\text{H}_2\text{en})_n[\text{La}(\text{edta})(\text{H}_2\text{O})]_{2n} \cdot 10n\text{H}_2\text{O}$  (**3**).

| D-H...A                               | D-H(Å) | H...A(Å) | D...A(Å) | D-H...A(°) |
|---------------------------------------|--------|----------|----------|------------|
| N <sub>5</sub> -H...O <sub>2</sub>    | 0.90   | 1.94     | 2.838(8) | 179        |
| N <sub>6</sub> -H...O <sub>10</sub>   | 0.90   | 2.05     | 2.942(8) | 174        |
| N <sub>6</sub> -H...O <sub>11</sub>   | 0.90   | 2.47     | 3.036(8) | 121        |
| N <sub>6</sub> -H...O <sub>8a</sub>   | 0.90   | 1.94     | 2.807(8) | 161        |
| O <sub>7</sub> -H...O <sub>5b</sub>   | 0.85   | 1.90     | 2.729(6) | 162        |
| O <sub>18</sub> -H...O <sub>12c</sub> | 0.86   | 2.32     | 2.721(6) | 109        |

Symmetry codes: (a)  $-x, -1-y, 1-z$ ; (b)  $-x, -1-y, -z$ ; (c)  $-1-x, -1-y, 1-z$ ;

**Table S11.** Comparisons of selected bond distances (Å) for **1** – **33**.

| Complexes                                                                                                                                                                                                               | La–O <sub>carboxy</sub> (av)<br>(Å) | La–N(av)<br>(Å) | La–O <sub>w</sub> (av)<br>(Å) |
|-------------------------------------------------------------------------------------------------------------------------------------------------------------------------------------------------------------------------|-------------------------------------|-----------------|-------------------------------|
| [La(Hida) <sub>2</sub> (H <sub>2</sub> O) <sub>2</sub> ] <sub>n</sub> nCl 4nH <sub>2</sub> O ( <b>1</b> )                                                                                                               | 2.599(2)                            | –               | 2.668(2)                      |
| K <sub>2n</sub> [La(нта) <sub>2</sub> ] <sub>n</sub> nH <sub>2</sub> O ( <b>2</b> )                                                                                                                                     | 2.616(5)                            | 2.68(1)         | –                             |
| (H <sub>2</sub> en) <sub>n</sub> [La(edta)(H <sub>2</sub> O)] <sub>2n</sub> 10nH <sub>2</sub> O ( <b>3</b> )                                                                                                            | 2.580(8)                            | 2.849(6)        | 2.550(5)                      |
| {La(H <sub>2</sub> O) <sub>4</sub> [La(1,3-pdta)(H <sub>2</sub> O)] <sub>3</sub> ] <sub>n</sub> ·11.25nH <sub>2</sub> O<br>( <b>4</b> ) <sup>1</sup>                                                                    | 2.621(7)                            | 2.876(7)        | 2.521(9)                      |
| [LaZn(Hida)(ida) <sub>2</sub> 0.5H <sub>2</sub> O] <sub>n</sub> ( <b>5</b> ) <sup>2</sup>                                                                                                                               | 2.615(3)                            | –               | –                             |
| {[La <sub>2</sub> Cu(mida) <sub>4</sub> (H <sub>2</sub> O) <sub>6</sub> ](H <sub>2</sub> O) <sub>4</sub> } ( <b>6</b> ) <sup>3</sup>                                                                                    | 2.622(3)                            | 2.876(3)        | 2.587(2)                      |
| {[La <sub>2</sub> Ni(mida) <sub>4</sub> (H <sub>2</sub> O) <sub>6</sub> ](H <sub>2</sub> O) <sub>4</sub> } ( <b>7</b> ) <sup>4</sup>                                                                                    | 2.636(2)                            | 2.864(2)        | 2.560(2)                      |
| [La(bzlida)(Hbzlida)] H <sub>2</sub> O ( <b>8</b> ) <sup>5</sup>                                                                                                                                                        | 2.540(2)                            | 2.880(2)        | 2.634(2)                      |
| [La(нта)(H <sub>2</sub> O)] <sub>n</sub> ( <b>9</b> ) <sup>6</sup>                                                                                                                                                      | 2.561(4)                            | 2.825(5)        | 2.569(4)                      |
| [La(нта)(H <sub>2</sub> O)] <sub>n</sub> ( <b>9a</b> ) <sup>7</sup>                                                                                                                                                     | 2.560(4)                            | 2.827(5)        | 2.558(4)                      |
| Na[La(edta)(H <sub>2</sub> O) <sub>3</sub> ] 5H <sub>2</sub> O ( <b>10</b> ) <sup>8</sup>                                                                                                                               | 2.493(4)                            | 2.768(4)        | 2.589(4)                      |
| {[La(edta)(H <sub>2</sub> O)] <sub>2</sub> ] <sub>n</sub> ( <b>11</b> ) <sup>9</sup>                                                                                                                                    | 2.524(3)                            | 2.849(4)        | 2.655(4)                      |
| [La <sub>5</sub> Cl <sub>2</sub> (edta) <sub>3</sub> (H <sub>2</sub> O) <sub>18</sub> ] <sub>n</sub> Cl <sub>n</sub> 8nH <sub>2</sub> O ( <b>12</b> ) <sup>10</sup>                                                     | 2.57(1)                             | 2.82(1)         | –                             |
| Na <sub>12n</sub> [La(edta)(HPO <sub>3</sub> ) <sub>4</sub> ] <sub>4n</sub> 8nNaCl 4nH <sub>2</sub> O<br>( <b>13</b> ) <sup>11</sup>                                                                                    | 2.570(7)                            | 2.822(8)        | –                             |
| Na <sub>12n</sub> [La(edta)(CO <sub>3</sub> ) <sub>4</sub> ] <sub>4n</sub> 8nNaCl 4nH <sub>2</sub> O ( <b>14</b> ) <sup>11</sup>                                                                                        | 2.572(6)                            | 2.829(7)        | –                             |
| K <sub>3n</sub> [La(edta)(HPO <sub>3</sub> ) <sub>3</sub> ] <sub>n</sub> ·7nH <sub>2</sub> O ( <b>15</b> ) <sup>12</sup>                                                                                                | 2.545(7)                            | 2.793(9)        | –                             |
| [La <sub>2</sub> (NO <sub>3</sub> ) <sub>2</sub> (edta)(H <sub>2</sub> O) <sub>5</sub> ] <sub>n</sub> 3nH <sub>2</sub> O ( <b>16</b> ) <sup>10</sup>                                                                    | 2.515(3)                            | 2.746(3)        | –                             |
| [La <sub>2</sub> (SO <sub>4</sub> )(edta)(H <sub>2</sub> O) <sub>3</sub> ] <sub>n</sub> ( <b>17</b> ) <sup>10</sup>                                                                                                     | 2.612(3)                            | 2.786(4)        | 2.532(3)                      |
| K <sub>6</sub> [La <sub>2</sub> (Hmal) <sub>2</sub> (edta) <sub>2</sub> ] ·14H <sub>2</sub> O ( <b>18</b> ) <sup>13</sup>                                                                                               | 2.563(2)                            | 2.801(2)        | –                             |
| (NH <sub>4</sub> ) <sub>8</sub> [La <sub>2</sub> (Hcit) <sub>2</sub> (edta) <sub>2</sub> ] 9H <sub>2</sub> O ( <b>19</b> ) <sup>13</sup>                                                                                | 2.563(2)                            | 2.814(2)        | –                             |
| K <sub>8</sub> [La <sub>2</sub> (Hcit) <sub>2</sub> (edta) <sub>2</sub> ] ·16H <sub>2</sub> O ( <b>20</b> ) <sup>13</sup>                                                                                               | 2.563(7)                            | 2.785(9)        | –                             |
| K <sub>4</sub> (NH <sub>4</sub> ) <sub>4</sub> [La <sub>2</sub> (Hcit) <sub>2</sub> (edta) <sub>2</sub> ] ·17H <sub>2</sub> O ( <b>21</b> ) <sup>14</sup>                                                               | 2.568(5)                            | 2.809(6)        | –                             |
| K <sub>2</sub> (NH <sub>4</sub> ) <sub>8</sub> {[La(edta)(H <sub>2</sub> O)] <sub>2</sub> ] <sub>2</sub><br>[La <sub>2</sub> (Hcit) <sub>2</sub> (edta) <sub>2</sub> ]} ·22H <sub>2</sub> O ( <b>22</b> ) <sup>14</sup> | 2.549(3)                            | 2.805(3)        | 2.650(3)                      |

|                                                                                                                                                                                                                                      |                       |                       |                       |
|--------------------------------------------------------------------------------------------------------------------------------------------------------------------------------------------------------------------------------------|-----------------------|-----------------------|-----------------------|
| $(\text{NH}_4)_2[\text{La}_2(1,3\text{-pdta})_2(\text{H}_2\text{O})_4] \cdot 8\text{H}_2\text{O}$ ( <b>23</b> ) <sup>15</sup>                                                                                                        | 2.531(2)              | 2.840(2)              | 2.574(2)              |
| $\text{K}_2[\text{La}_2(1,3\text{-pdta})_2(\text{H}_2\text{O})_4] \cdot 11\text{H}_2\text{O}$ ( <b>24</b> ) <sup>15</sup>                                                                                                            | 2.531(2)              | 2.832(2)              | 2.584(2)              |
| $[\text{La}(1,3\text{-Hpdt})]_n \cdot n\text{H}_2\text{O}$ ( <b>25</b> ) <sup>16</sup>                                                                                                                                               | 2.571(4)              | 2.858(3)              | –                     |
| $[\text{La}(1,3\text{-H}_2\text{pdta})(\text{H}_2\text{O})_2]_n \cdot \text{Cl}_n \cdot 2n\text{H}_2\text{O}$ ( <b>26</b> ) <sup>16</sup>                                                                                            | 2.505(2)              | –                     | 2.553(2)              |
| $[\text{La}(1,3\text{-H}_3\text{pdta})(\text{H}_2\text{O})_5]_n \cdot 2\text{Cl}_n \cdot 3n\text{H}_2\text{O}$ ( <b>27</b> ) <sup>16</sup>                                                                                           | 2.562(2)              | –                     | 2.566(5)              |
| $\{\text{La}(\text{H}_2\text{O})_4[\text{La}(1,3\text{-pdta})(\text{H}_2\text{O})_3]\}_n$ ( <b>28</b> ) <sup>17</sup>                                                                                                                | 2.495(3)              | 2.881(4)              | 2.536(3)              |
| $(\text{H}_2\text{en})_n[\text{La}_2(1,3\text{-pdta})_2(\text{H}_2\text{O})_2]_n \cdot 5n\text{H}_2\text{O}$ ( <b>29</b> ) <sup>18</sup>                                                                                             | 2.597(5)              | 2.867(5)              | 2.530(5)              |
| $(\text{NH}_4)_{2n}[\text{La}_2(1,3\text{-pdta})_2(\text{H}_2\text{O})_2]_n \cdot 4.5n\text{H}_2\text{O}$<br>( <b>30</b> ) <sup>18</sup>                                                                                             | 2.590(6)              | 2.871(7)              | 2.541(5)              |
| $[\text{La}_2(1,3\text{-pdta})_2(\text{H}_2\text{O})_4]_n \cdot \{\text{Sr}_2(\text{H}_2\text{O})_6\}_n \cdot$<br>$[\text{La}_2(1,3\text{-pdta})_2(\text{H}_2\text{O})_2]_n \cdot 18n\text{H}_2\text{O}$ ( <b>31</b> ) <sup>15</sup> | 2.542(3)/<br>2.555(3) | 2.864(4)/<br>2.861(4) | 2.504(3)/<br>2.557(3) |
| $\text{K}_4[\text{La}_2(\text{dtpa})_2(\text{H}_2\text{O})] \cdot 8\text{H}_2\text{O}$ ( <b>32</b> ) <sup>19</sup>                                                                                                                   | 2.548(6)              | 2.848(6)              | 2.675(5)              |
| $\text{K}[\text{KLa}(\text{Httha})(\text{H}_2\text{O})] \cdot 8\text{H}_2\text{O}$ ( <b>33</b> ) <sup>20</sup>                                                                                                                       | 2.557(2)              | 2.807(3)              | –                     |

1. M. L. Chen, Y. C. Guo, F. Yang, J. X. Liang, Z. X. Cao and Z. H. Zhou, *Dalton Trans.*, 2014, **43**, 6026–6031.
2. H. B. Xu, Y. H. Zhao, Z. M. Su, G. H. Li, Y. Ma, K. Z. Shao, D. X. Zhu, H. J. Zhang and S. M. Yue, *Chem. Lett.*, 2004, **33**, 446–447.
3. G. L. Zhuang, W. X. Chen, G. N. Zeng, J. G. Wang and W. L. Chen, *CrystEngComm*, 2012, **14**, 679–683.
4. W. X. Chen, G. L. Zhuang and S. T. Wu, *Z. Anorg. Allg. Chem.*, 2013, **639**, 817–820.
5. R. Puentes, J. Torres, C. Kremer, J. Cano, F. Lloret, D. Capucci and A. Bacchi, *Dalton Trans.*, 2016, **45**, 5356–5373.
6. Q. Z. Zhang, C. Z. Lu, W. B. Yang and Y. Q. Yu, *Inorg. Chem. Commun.*, 2004, **7**, 277–279.
7. L. Huang, L. P. Zhang and L. P. Jin, *J. Mol. Struct.*, 2004, **692**, 121–126.
8. K. Nakamura, T. Kurisaki, H. Wakita and T. Yamaguchi, *Acta Crystallogr. C*, 1995, **C51**, 1559–1563.
9. D. B. Xiong, H. H. Chen, X. X. Yang and J. T. Zhao, *Inorg. Chim. Acta*, 2007, **360**, 1616–1620.
10. Y. C. Guo, Y. H. Hou, X. Dong, Y. C. Yang, W. S. Xia, W. Z. Weng and Z. H. Zhou, *Inorg. Chim. Acta*, 2015, **434**, 221–229.
11. S. Y. Wang, S. Gao, J. W. Dai, Y. R. Shi, X. Dong, W. Z. Weng and Z. H. Zhou, *Dalton Trans.*, 2019, **48**, 2959–2966.
12. S. Gao, M. L. Chen and Z. H. Zhou, *Dalton Trans.*, 2014, **43**, 639–645.
13. M. L. Chen, S. Gao and Z. H. Zhou, *Dalton Trans.*, 2012, **41**, 1202–1209.
14. M. L. Chen, Z. Xu and Z. H. Zhou, *Polyhedron*, 2018, **153**, 213–217.

15. M. L. Chen, Y. H. Hou, W. S. Xia, W. Z. Weng, Z. X. Cao, Z. H. Zhou and H. L. Wan, *Dalton Trans.*, 2014, **43**, 8690-8697.
16. S. B. Etcheverry, M. C. Apella and E. J. Baran, *J. Inorg. Biochem.*, 1984, **20**, 269-274.
17. C. Streb, D. L. Long and L. Cronin, *Chem. Commun.*, 2007, DOI: 10.1039/b613808j, 471-473.
18. M. L. Chen, Y. Y. Feng, S. Y. Wang, Y. H. Cheng and Z. H. Zhou, *ACS Appl. Mater. Interfaces*, 2020, **12**, 1412-1418.
19. S. Gao, S. J. George and Z. H. Zhou, *Dalton Trans.*, 2016, **45**, 5388-5394.
20. R. Y. Wang, J. R. Li, T. Z. Jin, G. X. Xu, Z. Y. Zhou and X. G. Zhou, *Polyhedron*, 1997, **16**, 1361-1364.
